# Supplementary material for: A detailed study on the working mechanism of a heteropoly acid modified TiO2 photoanode for efficient dye-sensitized solar cells
Source: Royal Society of Chemistry journal article supplement (doi:10.1039/c4cp05795c), 2015-01-01
Supplement: c4cp05795c1.pdf [file c4cp05795c1.pdf]

# A Detailed Study on Working Mechanism of Heteropoly Acid Modified TiO<sub>2</sub> Photoanode for Efficient Dye-Sensitized Solar Cells

Yanxia Jiang,<sup>a</sup> Yulin Yang,<sup>\*a</sup> Liangsheng Qiang,<sup>a</sup> Ruiqing Fan,<sup>\*a</sup> Liang Li,<sup>a</sup> Tengling Ye,<sup>a</sup> Yong, Na,<sup>a</sup> Yan Shi,<sup>a</sup> Tianzhu, Luan<sup>b</sup>

<sup>a</sup>Department of Chemistry, Harbin Institute of Technology, Harbin, 150001, P. R. China.

<sup>b</sup>The First Affiliated Hospital of Harbin Medical University, Harbin, 150001, P. R. China.

## Supporting Information

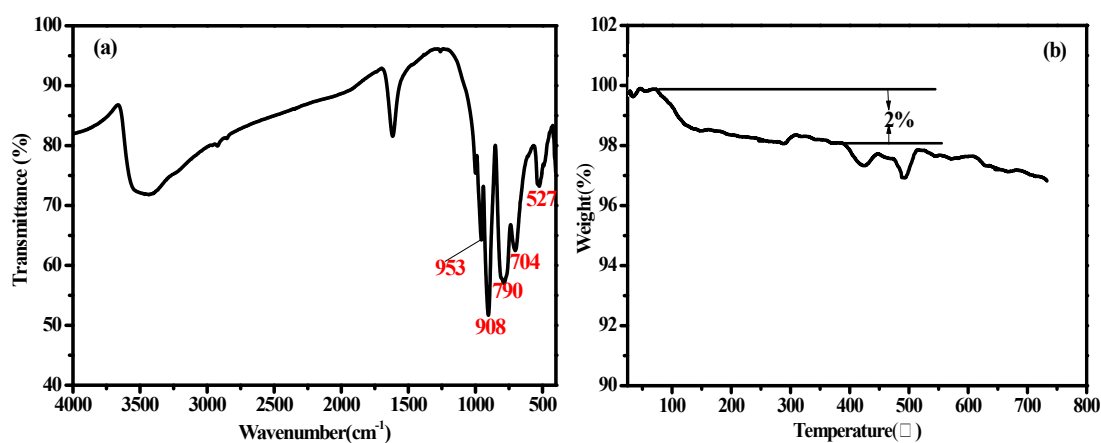

Figure S1. (a) FT-IR spectrum of SiW<sub>11</sub>Ni and (b) TG spectrum of SiW<sub>11</sub>Ni.

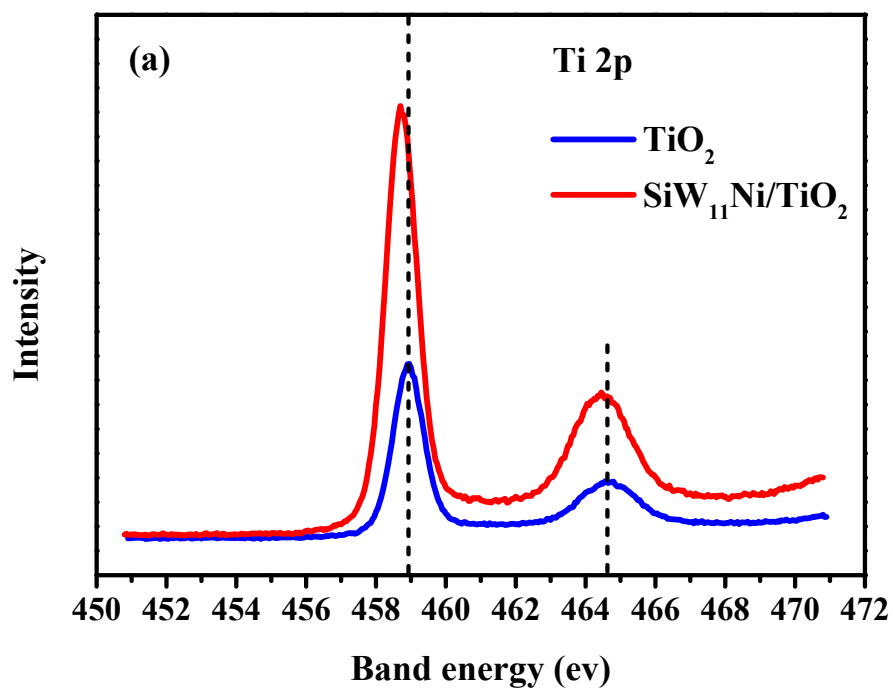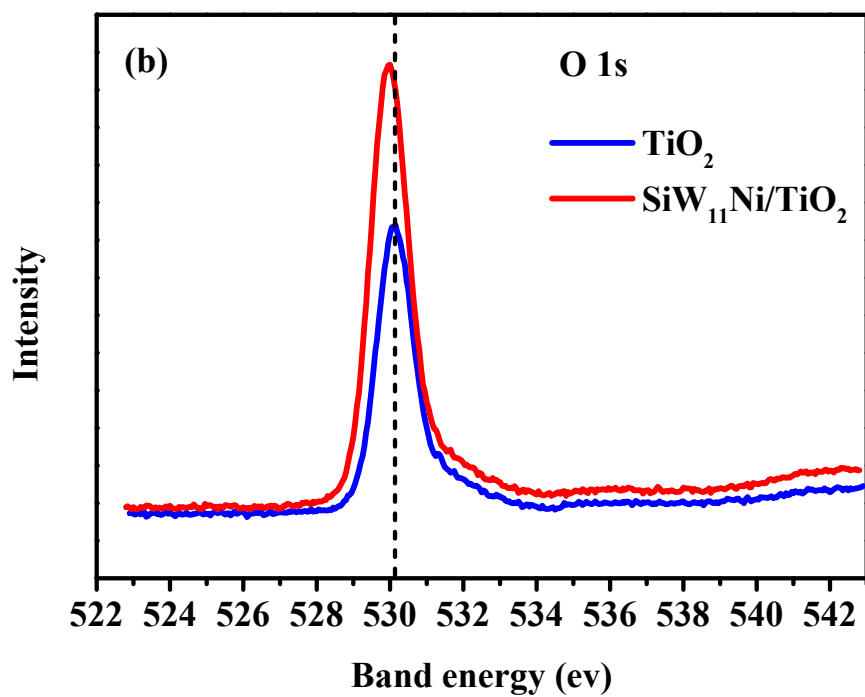

Figure S2. (a) High resolution XPS survey spectra of the Ti 2p region, (b) of the O 1s region.

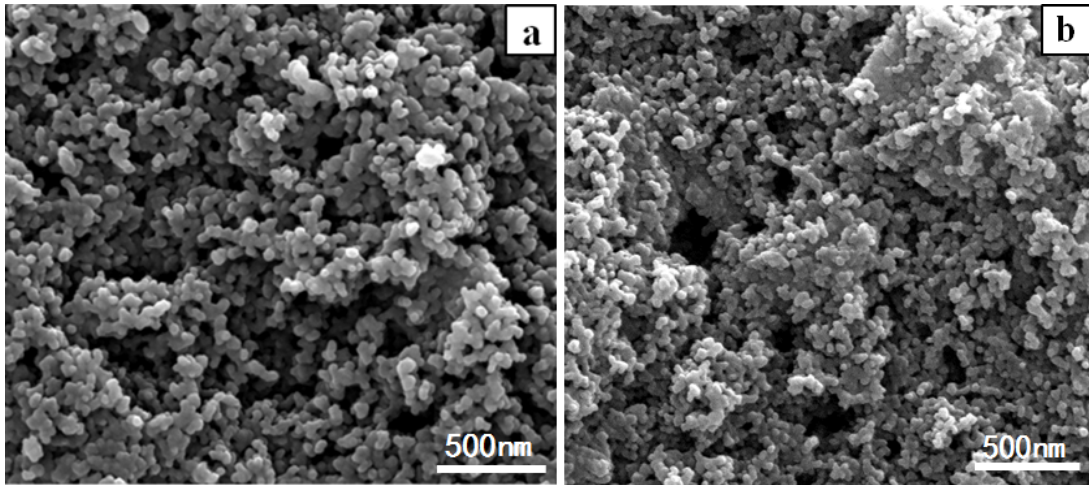

**Figure S3.** SEM images of TiO<sub>2</sub> (a) and SiW<sub>11</sub>Ni/TiO<sub>2</sub> (b).

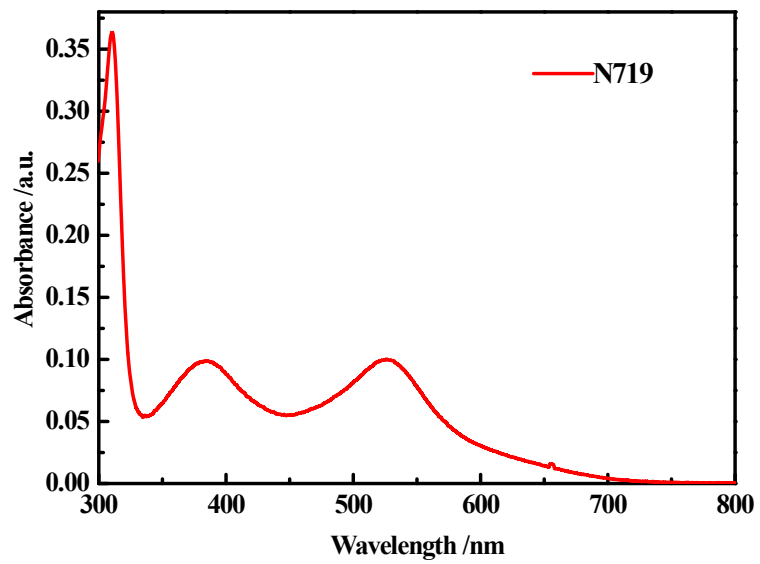

**Figure S4.** The absorption spectra of N719.

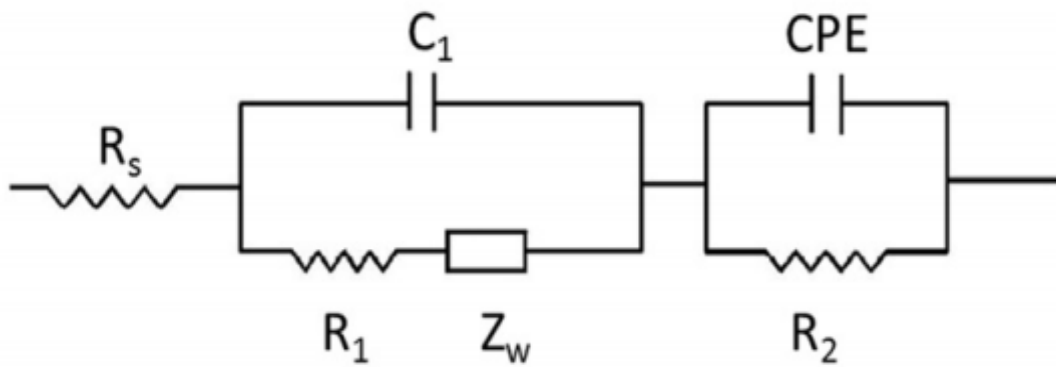

**Figure S5.** Equivalent circuit used to fit the impedance measurements on the DSSCs.

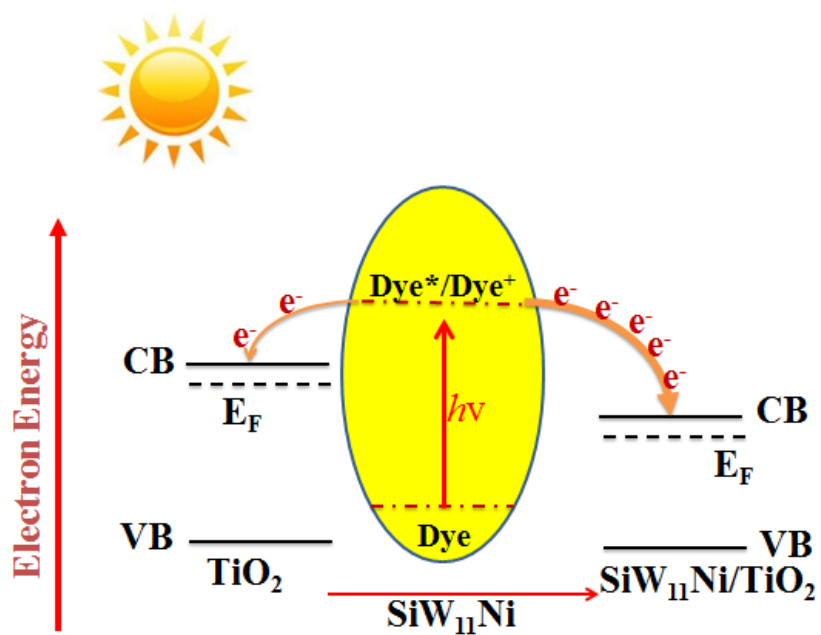

**Scheme S1.** The schematic energy level diagram for the electrode interface. (VB=valence band, CB= conduction band)
